# Supplementary material for: MiR 208a Regulates Mitochondrial Biogenesis in Metabolically Challenged Cardiomyocytes
Source: MDPI journal article supplement (doi:10.3390/cells10113152), 2021-11-13
Supplement: s1 [file s1]

## SUPPLEMENTARY MATERIAL

### Human 208 primers:

- Taqman hsa-miRNA 208 Primers (Cat No: 000511)
- Taqman hsa-U6 snRNA primers (Cat No: 001973)

**Table S1.** Primers for the miR 208a target mRNAs for human cardiomyocytes

|   | Human target gene                               | Primers | Sequence             |
|---|-------------------------------------------------|---------|----------------------|
| 1 | Stanniocalcin-1<br>(Stc1)                       | Forward | GGCGACCACCAAAGTCAAAC |
|   |                                                 | Reverse | TACTTGTCGCATTGGGGTCC |
| 2 | Nuclear Receptor<br>Coactivator 7 (NCOA7)       | Forward | GCCCTGGAAACTCCCTCTTC |
|   |                                                 | Reverse | AGCCCAACATCTAGGGGCTA |
| 3 | Mediator Complex<br>Subunit 7 (MED)7            | Forward | CCCTTTGGAAAGTCAGGGCA |
|   |                                                 | Reverse | TCTCAGCTGTTTCAAGCCGT |
| 4 | Mitochondrial Ribosomal<br>Protein S28 (MRPS28) | Forward | ACAGATGGGACCTGCAAAGG |
|   |                                                 | Reverse | TCTAATAGCCGCAACCGGAC |

|   |                                                                                                |                |                                  |
|---|------------------------------------------------------------------------------------------------|----------------|----------------------------------|
| 5 | <b>Sortin Nexin 10 (SNX10)</b>                                                                 | <b>Forward</b> | <b>AGTGTCTGGGTTCGAGATCCT</b>     |
|   |                                                                                                | <b>Reverse</b> | <b>GGTAACACTGCCCCACTGAT</b>      |
| 6 | <b>ATP synthase subunit 5,<br/>mitochondrial (ATP5)</b>                                        | <b>Forward</b> | <b>TACTCGAAGCCTCGATTGGC</b>      |
|   |                                                                                                | <b>Reverse</b> | <b>GCGGGCTAAACAGACGTGTA</b>      |
| 7 | <b>Beta actin</b>                                                                              | <b>Forward</b> | <b>CCTTTGCCGATCCGCCG</b>         |
|   |                                                                                                | <b>Reverse</b> | <b>AACATGATCTGGGTCATCTTCTCGC</b> |
| 8 | <b>Mitochondrial Contact<br/>Site and Cristae<br/>Organizing System<br/>Protein 1 (MINOS1)</b> | <b>Forward</b> | <b>CGGATGCGGTCGTGAAGATA</b>      |
|   |                                                                                                | <b>Reverse</b> | <b>ACTGCTCCTGCTCTTTGACA</b>      |

**Table S2.** List of antibodies used in this study. Ms: Mouse, Rb: Rabbit

| <b>Antibodies</b>            | <b>Source</b> | <b>Catalog number:</b> |
|------------------------------|---------------|------------------------|
| Beta actin                   | Ms            | Ab197277               |
| GAPDH                        | Rb            | 2118S                  |
| Rodent Total OXPHOS cocktail | --            | MS604/H4664            |
| • NDUFS3                     | --            | MS110/C1924            |
| • Complex V beta             | --            | MS503                  |
| • Complex III                | --            | MS305                  |

|                          |    |                     |
|--------------------------|----|---------------------|
| • Complex IV sub         | -- | MS407               |
| • Complex II             | -- | Ab110410/D0604      |
| Anti-OXPHOS complex IV   | -- | 459600 (Invitrogen) |
| MHC- $\beta$             | Ms | Sc376157            |
| Citrate Synthase         | Rb | Ab96600             |
| CPT1B                    | Rb | Ab104662            |
| Fibronectin              | Rb | Ab23750             |
| ANP                      | Rb | Ab91250             |
| PGC1 alpha               | Rb | Ab54481             |
| MHC- $\alpha$            | Rb | Ab224046            |
| Thyroid Hormone Receptor | Rb | Ab53729             |
| ACAD                     | Rb | Ab196655            |
| NDUFS4                   | Ms | Ab87399             |
| TFAM                     | Rb | Ab138351            |
| ACADM/MCAD               | Rb | 2758-1              |
| GAPDH                    | Ms | Sc365062            |
| NRF1                     | Rb | Ab34682             |
| ANP                      | Ms | Sc515701            |
| CPT1                     | Ms | Sc515577            |
| Cytochrome C             | Ms | ab13575             |

Figure S1A: Stanniocalcin 1

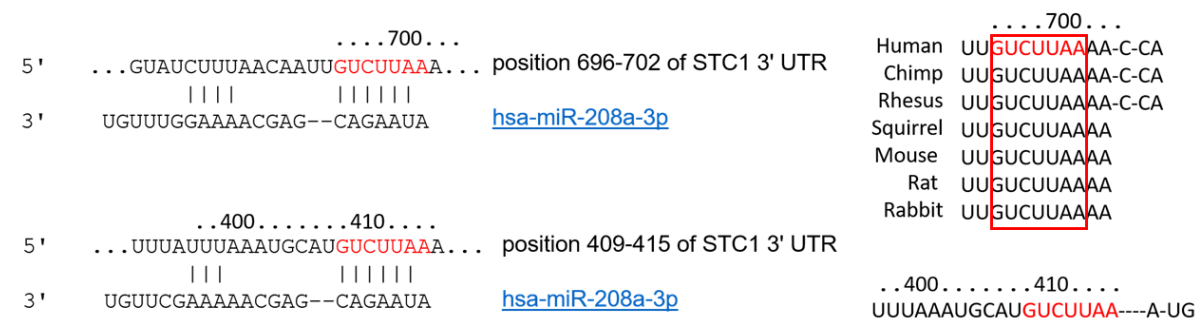

Figure S1B: MED7

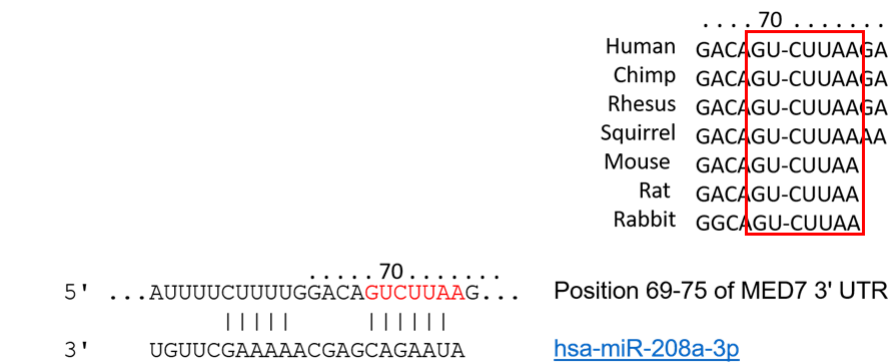

Figure S1C: SNX10

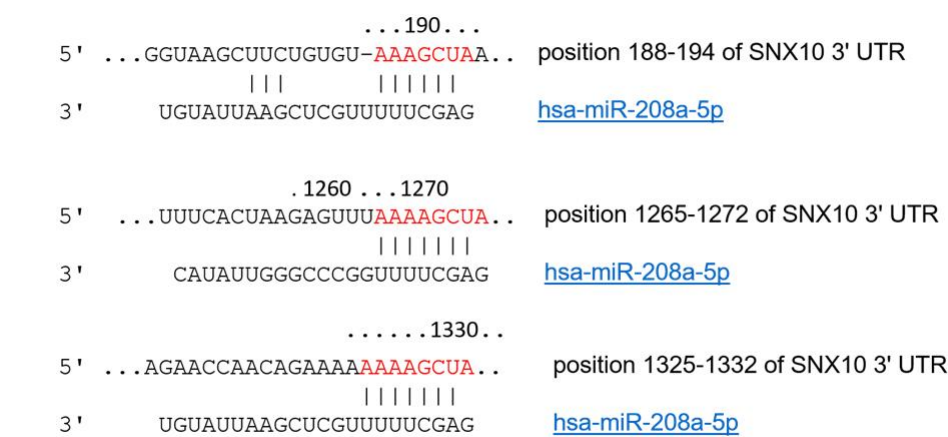

Figure S1D: MRPS28

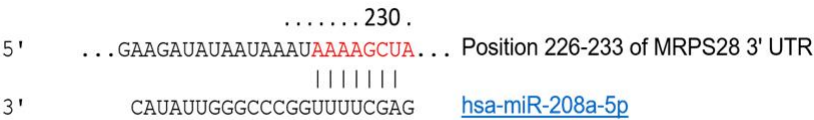

Figure S1E: MINOS1

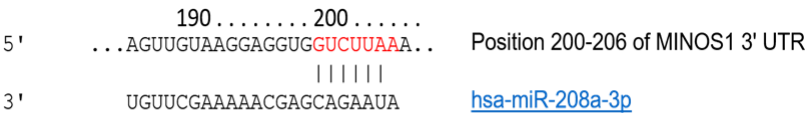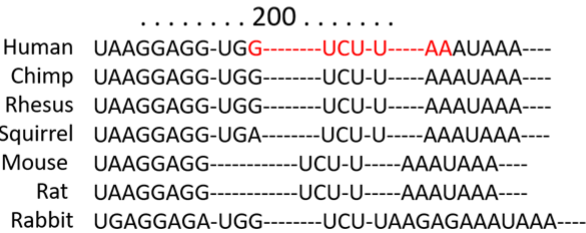

Supplementary Figure S1 (in support of Figure 2 in the main manuscript). mRNA targets of miR 208a in cardiomyocytes incubated in diabetogenic conditions. The alignment between miR 208a sequence and specific mRNAs as well as the level of conservation of those sequences in different species are also shown.

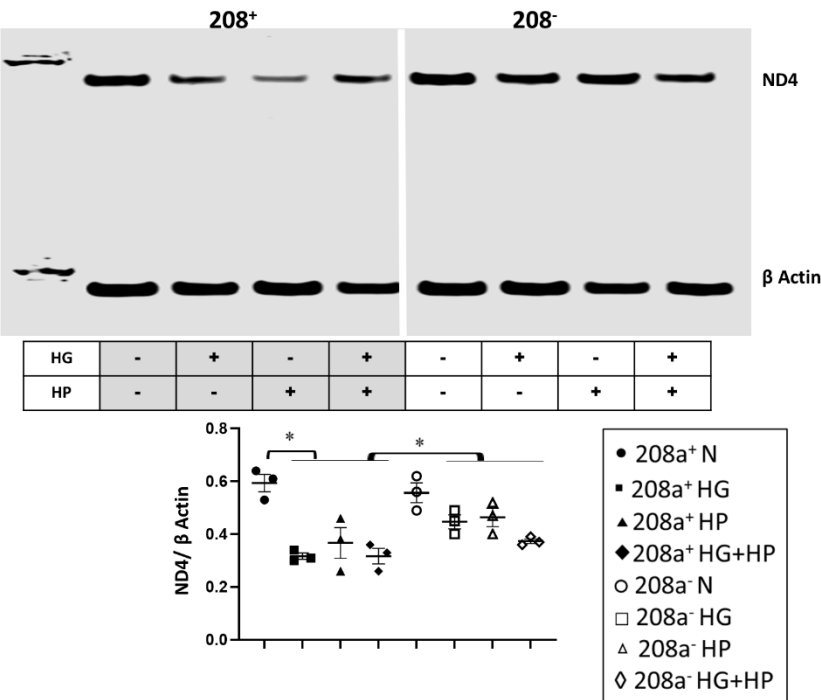

**Supplementary Figure S2 (in support of Figure 4C in the main manuscript).** SV40 human cardiomyocytes were incubated in DMEM with either 5 mM glucose, 25 mM glucose (high glucose, HG) or 20  $\mu$ M bovine serum albumin (BSA)-bound palmitate (high palmitate, HP) for 24 hours. Mitochondrial DNA. Total DNA was subjected to quantitative real time PCR using a designed primer for mitochondrial NADH dehydrogenase 4 (ND4). The results are expressed as Mean  $\pm$  SEM of three independent experiments. \*P < 0.0

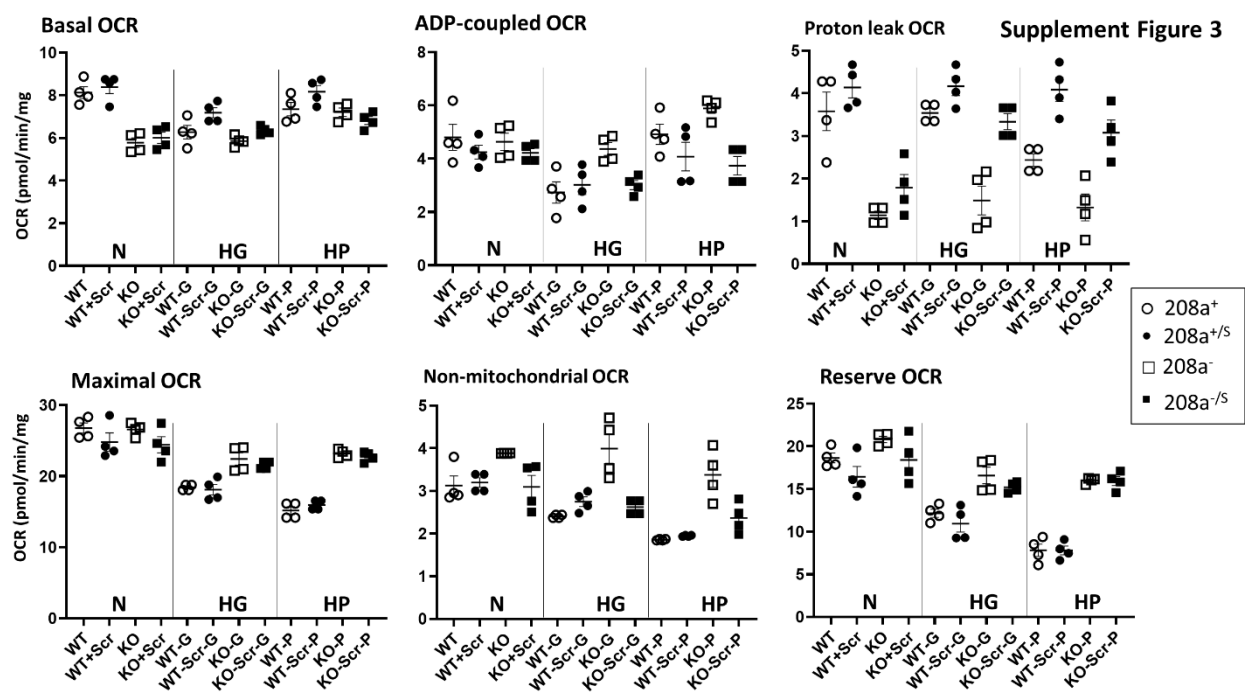

**Supplementary Figure S3 (in support of Figure 5 in the main manuscript).** The effect the scrambled control miR sequence on SV40 cardiomyocytes respiratory properties

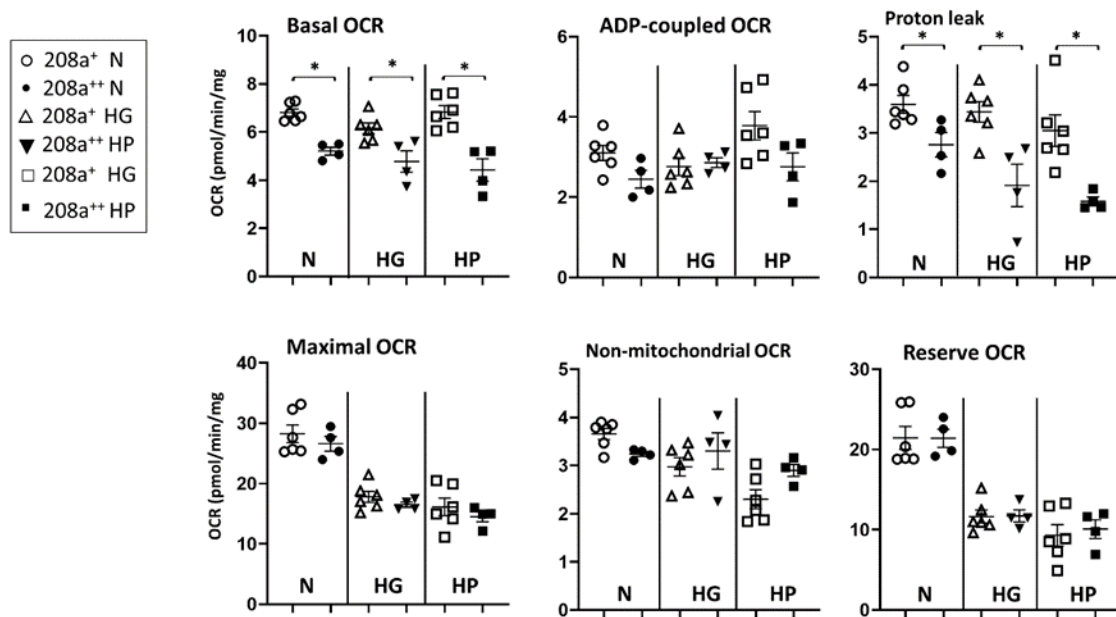

**Supplementary Figure S4** (in support of Figure 5 in the main manuscript). A full description of the effect of miR 208 overexpression on mitochondrial respiratory properties

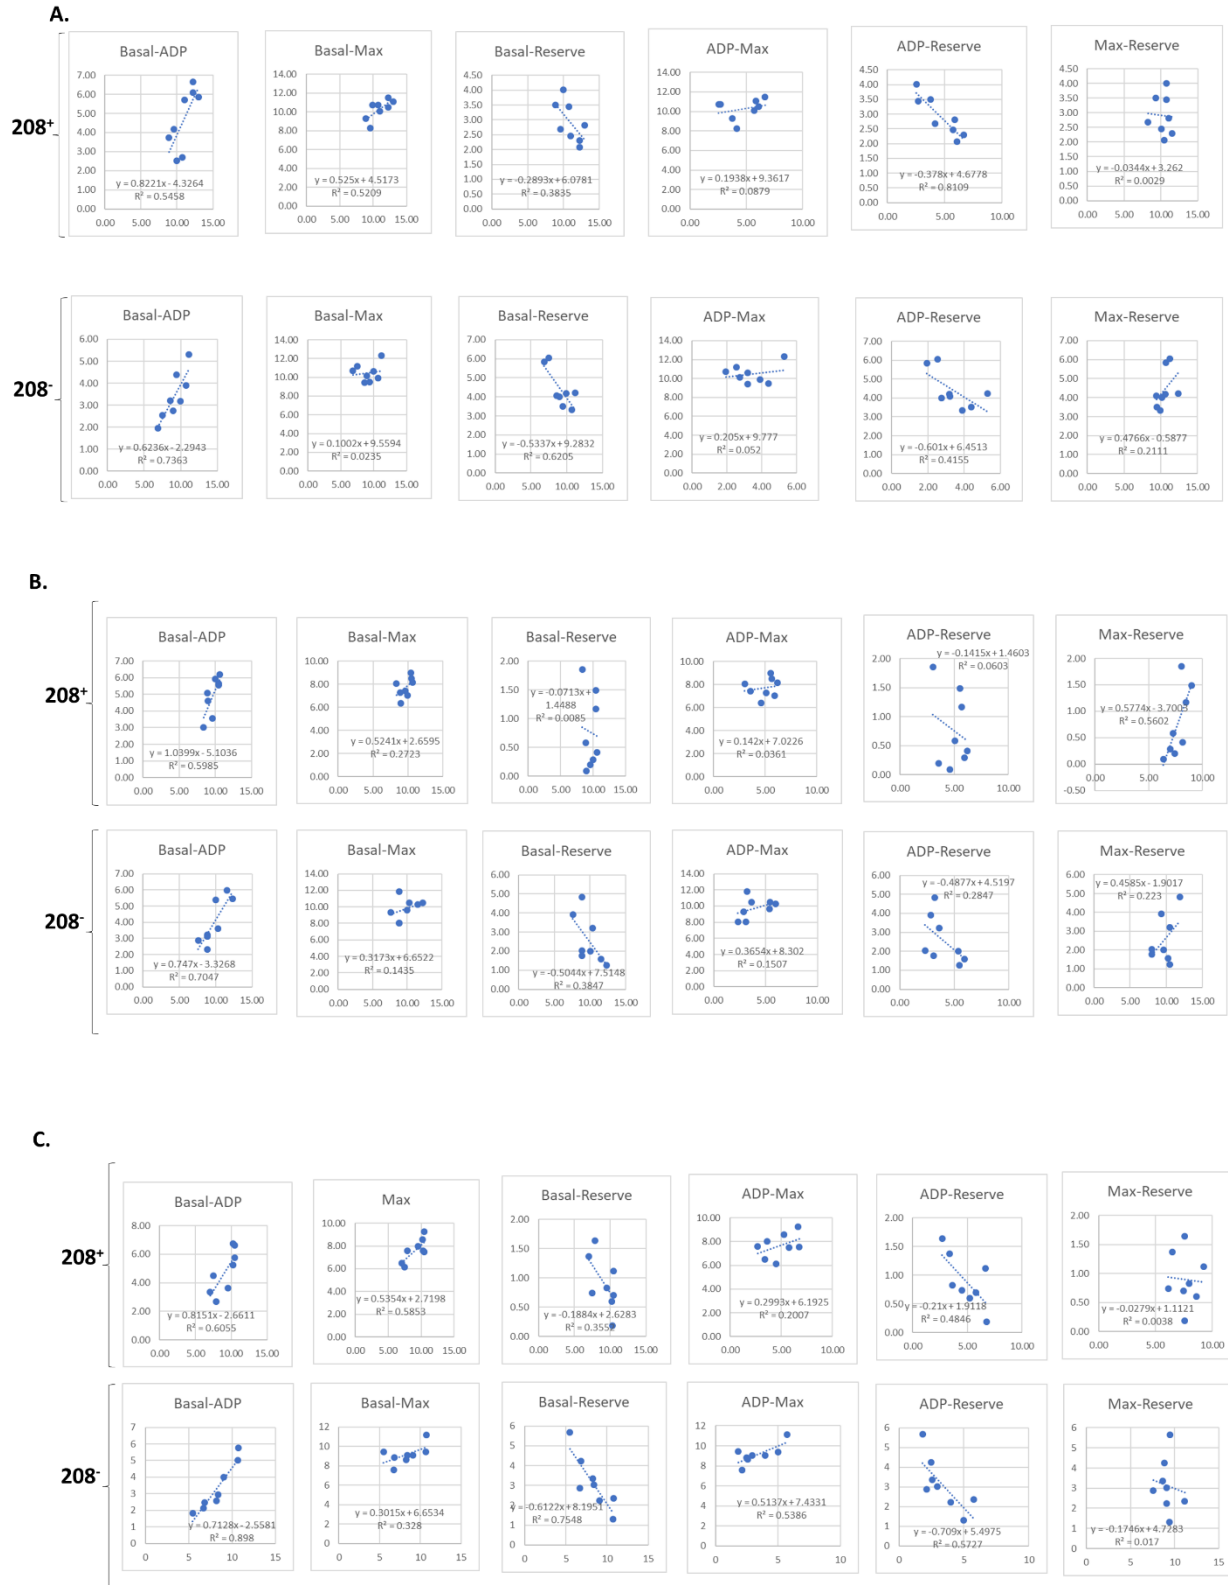

**Supplementary Figures S5 (in support of Figure 5).** Correlations between OCR parameters in human SV40 cardiomyocytes.
